# Supplementary material for: Mapping Protein Targets of Carnosol, a Molecule Identified in Rosmarinus officinalis: In Silico Docking Studies and Network Pharmacology
Source: MDPI journal article supplement (doi:10.3390/scipharm91020019), 2023-04-10
Supplement: s1 [file s1]

## *Supplementary Material*

**Table S1.** Fragment ions of chemical constituents tentatively identified in *Rosmarinus officinalis* by HPLC-QTOF-MS/MS

| No. Fig. 2 | Fragment ions                                                                                            |                                                                 |           | Identification criteria | References |
|------------|----------------------------------------------------------------------------------------------------------|-----------------------------------------------------------------|-----------|-------------------------|------------|
|            | Fragment type                                                                                            | Fragment formula                                                | m/z       |                         |            |
| 1          | [M-H] <sup>-</sup>                                                                                       | [C <sub>22</sub> H <sub>21</sub> O <sub>12</sub> ] <sup>-</sup> | 477.10570 |                         |            |
|            | [M-H-CH <sub>3</sub> ] <sup>-</sup>                                                                      | [C <sub>21</sub> H <sub>18</sub> O <sub>12</sub> ] <sup>-</sup> | 462.06633 |                         |            |
|            | [M-H-C <sub>6</sub> H <sub>11</sub> O <sub>5</sub> ] <sup>-</sup>                                        | [C <sub>16</sub> H <sub>11</sub> O <sub>7</sub> ] <sup>-</sup>  | 315.04814 |                         |            |
| 2          | [M-H] <sup>-</sup>                                                                                       | [C <sub>18</sub> H <sub>15</sub> O <sub>8</sub> ] <sup>-</sup>  | 359.07991 | a, b                    | [1]        |
|            | [M-H-C <sub>9</sub> H <sub>6</sub> O <sub>3</sub> ] <sup>-</sup>                                         | [C <sub>9</sub> H <sub>9</sub> O <sub>5</sub> ] <sup>-</sup>    | 197.04519 |                         |            |
|            | [M-H-C <sub>9</sub> H <sub>8</sub> O <sub>4</sub> ] <sup>-</sup>                                         | [C <sub>9</sub> H <sub>7</sub> O <sub>4</sub> ] <sup>-</sup>    | 179.03460 |                         |            |
|            | [M-H-C <sub>9</sub> H <sub>8</sub> O <sub>4</sub> -H <sub>2</sub> O] <sup>-</sup>                        | [C <sub>9</sub> H <sub>5</sub> O <sub>3</sub> ] <sup>-</sup>    | 161.02342 |                         |            |
|            | [M-H-C <sub>9</sub> H <sub>8</sub> O <sub>4</sub> -H <sub>2</sub> O-CH <sub>2</sub> O] <sup>-</sup>      | [C <sub>8</sub> H <sub>7</sub> O <sub>2</sub> ] <sup>-</sup>    | 135.04261 |                         |            |
|            |                                                                                                          |                                                                 |           |                         |            |
| 3          | [M-H] <sup>-</sup>                                                                                       | [C <sub>31</sub> H <sub>27</sub> O <sub>14</sub> ] <sup>-</sup> | 623.10900 | a, b                    | [2]        |
|            | [M-H-C <sub>15</sub> H <sub>16</sub> O <sub>7</sub> ] <sup>-</sup>                                       | [C <sub>16</sub> H <sub>11</sub> O <sub>7</sub> ] <sup>-</sup>  | 315.04949 |                         |            |
|            | [M-H-C <sub>15</sub> H <sub>16</sub> O <sub>7</sub> -CH <sub>3</sub> ] <sup>-</sup>                      | [C <sub>15</sub> H <sub>8</sub> O <sub>7</sub> ] <sup>-</sup>   | 300.03166 |                         |            |
| 4          | [M-H] <sup>-</sup>                                                                                       | [C <sub>17</sub> H <sub>13</sub> O <sub>6</sub> ] <sup>-</sup>  | 313.07089 | a, b                    | [1]        |
|            | [M-H-CH <sub>3</sub> ] <sup>-</sup>                                                                      | [C <sub>16</sub> H <sub>10</sub> O <sub>6</sub> ] <sup>-</sup>  | 298.04655 |                         |            |
|            | [M-H-CH <sub>3</sub> -CH <sub>3</sub> ] <sup>-</sup>                                                     | [C <sub>15</sub> H <sub>7</sub> O <sub>6</sub> ] <sup>-</sup>   | 283.01956 |                         |            |
| 5          | [M+CH <sub>3</sub> COO] <sup>-</sup>                                                                     | [C <sub>39</sub> H <sub>51</sub> O <sub>10</sub> ] <sup>-</sup> | 691.34456 |                         |            |
|            | [M+CH <sub>3</sub> COO-C <sub>17</sub> H <sub>19</sub> O] <sup>-</sup>                                   | [C <sub>20</sub> H <sub>25</sub> O <sub>5</sub> ] <sup>-</sup>  | 345.17075 |                         |            |
|            | [M+CH <sub>3</sub> COO-C <sub>17</sub> H <sub>19</sub> O-CO <sub>2</sub> -H <sub>2</sub> O] <sup>-</sup> | [C <sub>19</sub> H <sub>23</sub> O <sub>2</sub> ] <sup>-</sup>  | 283.17058 |                         |            |
|            |                                                                                                          |                                                                 |           |                         |            |
| 6          | [M-H] <sup>-</sup>                                                                                       | [C <sub>20</sub> H <sub>25</sub> O <sub>5</sub> ] <sup>-</sup>  | 345.17019 | a, b                    | [3]        |
|            | [M-H-CO <sub>2</sub> -H <sub>2</sub> O] <sup>-</sup>                                                     | [C <sub>19</sub> H <sub>23</sub> O <sub>2</sub> ] <sup>-</sup>  | 283.16949 |                         |            |
| 7          | [M-H] <sup>-</sup>                                                                                       | [C <sub>20</sub> H <sub>23</sub> O <sub>5</sub> ] <sup>-</sup>  | 343.15454 | a, b                    | [4]        |
|            | [M-H-CO <sub>2</sub> ] <sup>-</sup>                                                                      | [C <sub>19</sub> H <sub>23</sub> O <sub>3</sub> ] <sup>-</sup>  | 283.16949 |                         |            |
| 8          | [M-H] <sup>-</sup>                                                                                       | [C <sub>24</sub> H <sub>27</sub> O <sub>9</sub> ] <sup>-</sup>  | 457.1481  |                         |            |
|            | [M-H-C <sub>4</sub> H <sub>4</sub> O <sub>5</sub> ] <sup>-</sup>                                         | [C <sub>20</sub> H <sub>23</sub> O <sub>5</sub> ] <sup>-</sup>  | 343.15461 |                         |            |
|            | [M-H-C <sub>4</sub> H <sub>4</sub> O <sub>5</sub> -CO <sub>2</sub> ] <sup>-</sup>                        | [C <sub>19</sub> H <sub>23</sub> O <sub>3</sub> ] <sup>-</sup>  | 299.16542 |                         |            |

|   |                                                           |                                                                                                                                  |                        |      |     |
|---|-----------------------------------------------------------|----------------------------------------------------------------------------------------------------------------------------------|------------------------|------|-----|
| 9 | [M-H] <sup>-</sup><br>[M-H-CO <sub>2</sub> ] <sup>-</sup> | [C <sub>20</sub> H <sub>25</sub> O <sub>4</sub> ] <sup>-</sup><br>[C <sub>19</sub> H <sub>25</sub> O <sub>2</sub> ] <sup>-</sup> | 329.17600<br>285.18618 | a, b | [1] |
|---|-----------------------------------------------------------|----------------------------------------------------------------------------------------------------------------------------------|------------------------|------|-----|

<sup>a</sup> Collision energy used to these fragments was 20 or 40 eV. <sup>a</sup> Tentative identification based on m/z negative mode, reported in the literature for *Rosmarinus officinalis* or other species of the *Lamiaceae* family. <sup>b</sup> Tentative identification based on the fragmentation pattern study (ESI-QTOF) and data reported in scientific articles.

## Figure S1. Compound fragment spectrum results (MS/MS)

### Compound 1

Retention time: 10.639

m/z [M-H]: 477.1028

Formula: C<sub>22</sub>H<sub>22</sub>O<sub>12</sub>

Tentative annotation: Flavonoid-glycosylated type

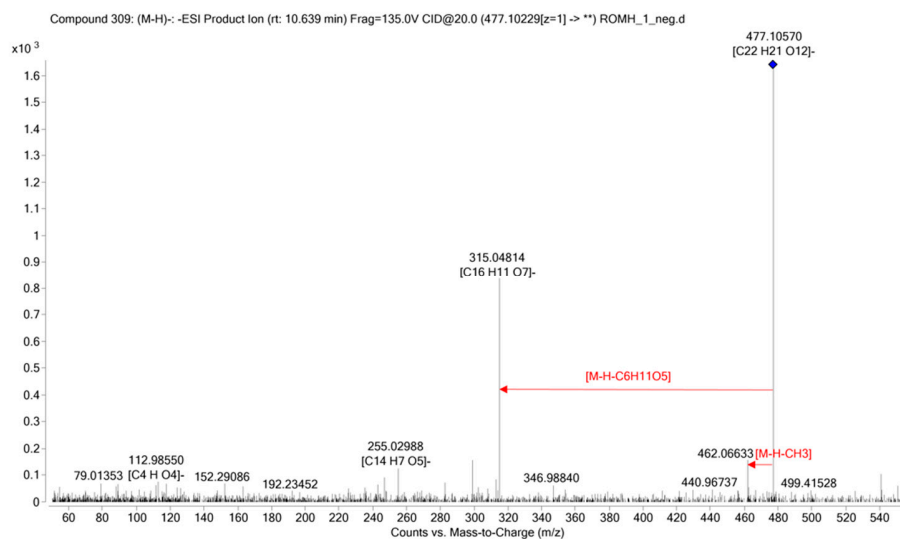

### Compound 2

Retention time: 11.256

m/z [M-H]: 359.0772

Formula: C<sub>18</sub>H<sub>16</sub>O<sub>8</sub>

Tentative annotation: Rosmarinic acid

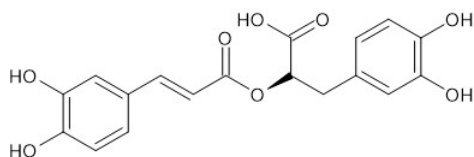

Compound 326: (M-H)<sup>-</sup> -ESI Product Ion (rt: 11.256 min) Frag=135.0V CID@20.0 (359.07651[z=1] -> \*\*) ROMH\_1\_neg.d

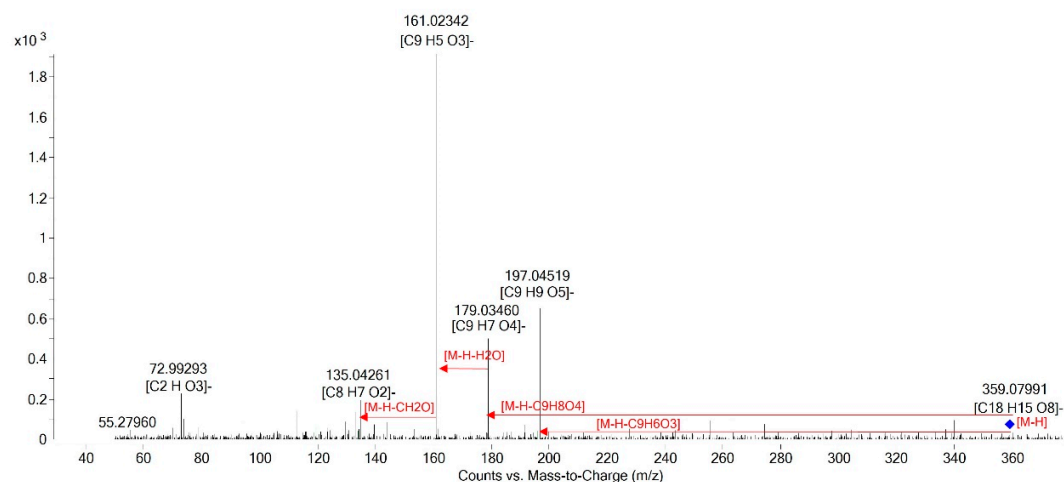

### Compound 3

Retention time: 11.35

m/z [M-H]<sup>-</sup>: 623.1396

Formula: C<sub>31</sub>H<sub>28</sub>O<sub>14</sub>

Tentative annotation: Isorhamnetin-rutinoside

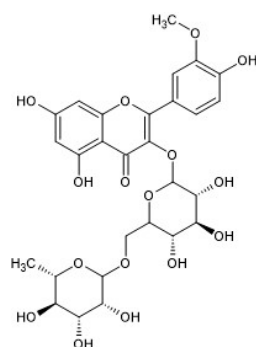

Compound 331: (M-H)<sup>-</sup> -ESI Product Ion (rt: 11.355 min) Frag=135.0V CID@40.0 (623.13940[z=1] -> \*\*) ROMH\_1\_neg.d

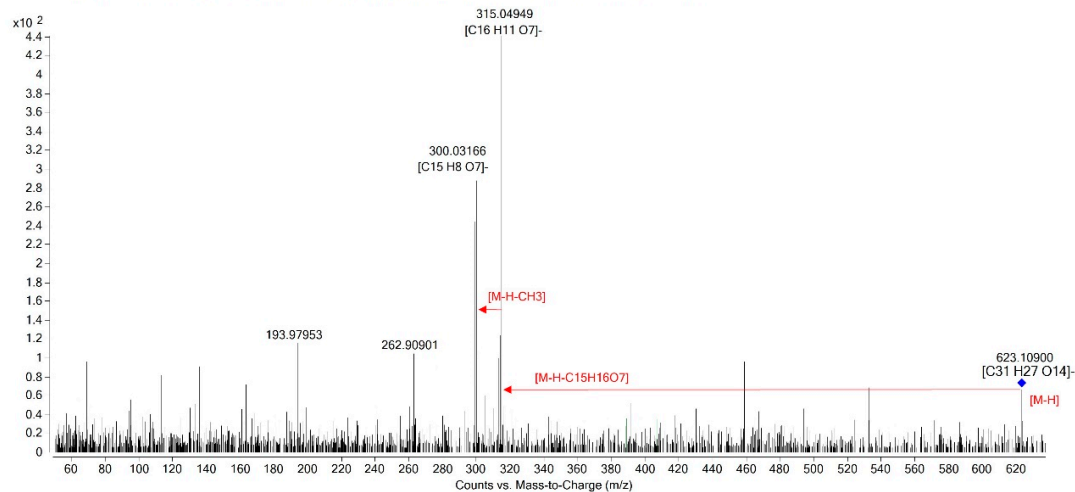

## Compound 4

Retention time: 13.726

m/z [M-H]: 313.0709

Formula: C<sub>17</sub>H<sub>14</sub>O<sub>6</sub>

Tentative annotation: Dihydroxy-dimethoxyflavone

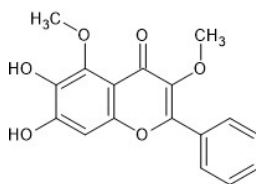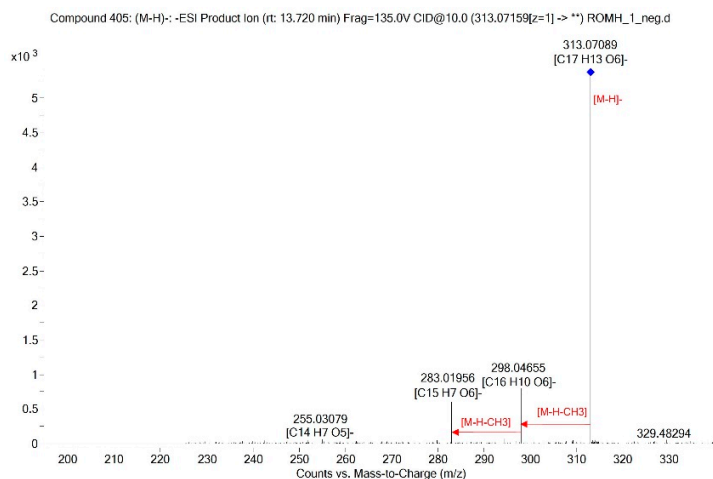

## Compound 5

Retention time: 14.012

m/z [M+CH<sub>3</sub>COO]<sup>-</sup>: 632.33497

Formula: C<sub>38</sub>H<sub>48</sub>O<sub>8</sub>

Tentative annotation: Diterpene

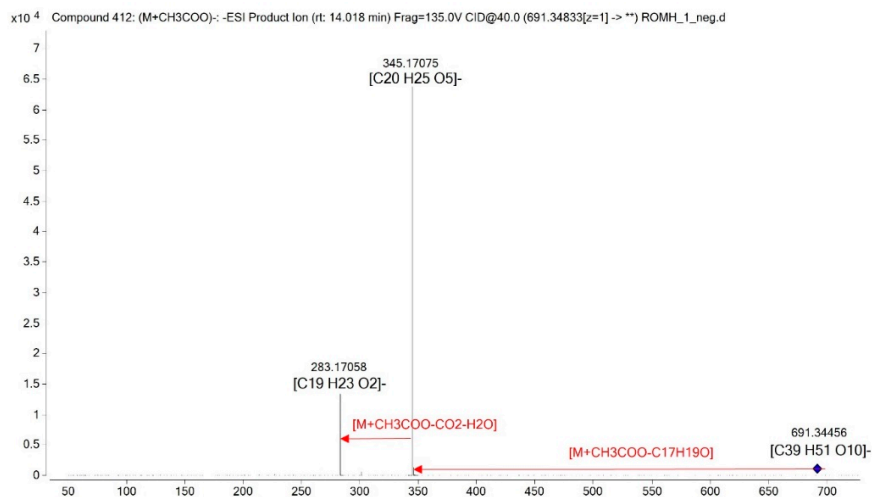

## Compound 6

Retention time: 14.478

m/z [M-H]<sup>-</sup>: 345.1707

Formula: C<sub>20</sub>H<sub>26</sub>O<sub>5</sub>

Tentative annotation: Rosmanol

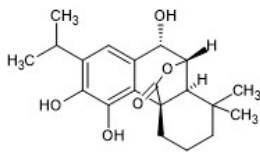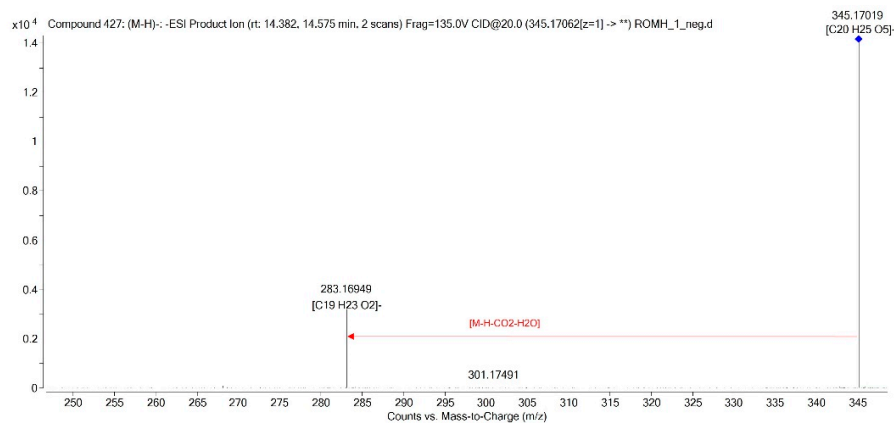

## Compound 7

Retention time: 15.558

m/z [M-H]<sup>-</sup>: 343.1551

Formula: C<sub>20</sub>H<sub>24</sub>O<sub>5</sub>

Tentative annotation: Rosmadial

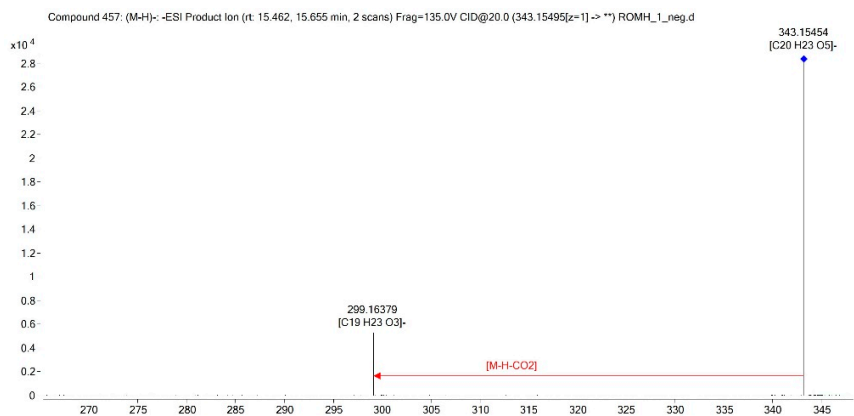

## Compound 8

Retention time: 15.597

m/z [M-H]<sup>-</sup>: 457.1481

Formula: C<sub>24</sub>H<sub>26</sub>O<sub>9</sub>

Tentative annotation: Diterpene type

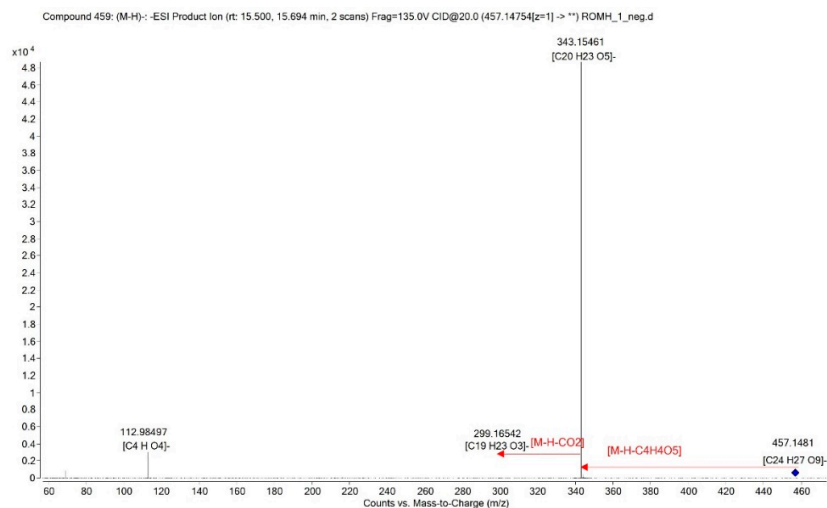

## Compound 9

Retention time: 16.077

m/z [M-H]<sup>-</sup>: 329.1764

Formula: C<sub>20</sub>H<sub>26</sub>O<sub>4</sub>

Tentative annotation: Carnosol

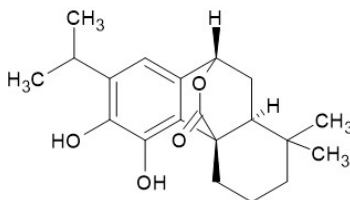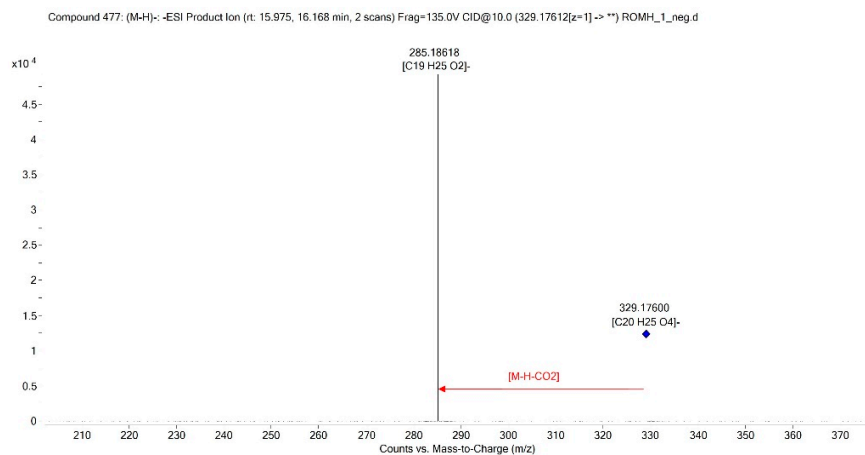

**Table S2.** Docking score for 708 human proteins with carnosol.

|    | <b>Carnosol</b>                    |              |              |              |                       |
|----|------------------------------------|--------------|--------------|--------------|-----------------------|
|    | <b>Binding Affinity (kcal/mol)</b> |              |              |              |                       |
|    | <b>Protein</b>                     | <b>Run 1</b> | <b>Run 2</b> | <b>Run 3</b> | <b><i>Average</i></b> |
| 1  | 3O0I                               | -10.9        | -10.9        | -10.9        | -10.9                 |
| 2  | 3NMQ                               | -10.4        | -10.4        | -10.4        | -10.4                 |
| 3  | 1RY8                               | -10.4        | -10.4        | -10.4        | -10.4                 |
| 4  | 2WKM                               | -10.3        | -10.3        | -10.3        | -10.3                 |
| 5  | 1N83                               | -10.0        | -10.0        | -10.0        | -10.0                 |
| 6  | 1HFQ                               | -10.0        | -10.0        | -10.0        | -10.0                 |
| 7  | 3WHW                               | -9.9         | -9.9         | -9.9         | -9.9                  |
| 8  | 3L0L                               | -9.9         | -9.9         | -9.9         | -9.9                  |
| 9  | 2XVT                               | -9.9         | -9.9         | -9.9         | -9.9                  |
| 10 | 1TQN                               | -9.8         | -9.8         | -9.8         | -9.8                  |
| 11 | 1DGB                               | -9.8         | -9.8         | -9.8         | -9.8                  |
| 12 | 4XII                               | -9.8         | -9.8         | -9.8         | -9.8                  |
| 13 | 1P8D                               | -9.7         | -9.7         | -9.7         | -9.7                  |
| 14 | 4DRJ                               | -9.7         | -9.7         | -9.7         | -9.7                  |
| 15 | 4AOJ                               | -9.6         | -9.6         | -9.6         | -9.6                  |
| 16 | 1UHL                               | -9.6         | -9.6         | -9.6         | -9.6                  |
| 17 | 1ZXM                               | -9.6         | -9.6         | -9.6         | -9.6                  |
| 18 | 4FA2                               | -9.5         | -9.5         | -9.5         | -9.5                  |
| 19 | 4J52                               | -9.5         | -9.5         | -9.5         | -9.5                  |
| 20 | 3X36                               | -9.2         | -9.2         | -9.2         | -9.2                  |
| 21 | 1UY7                               | -10.9        | -10.9        | -10.9        | -10.9                 |
| 22 | 1UY8                               | -10.9        | -10.9        | -10.8        | -10.9                 |
| 23 | 1UY9                               | -10.8        | -10.8        | -10.8        | -10.8                 |
| 24 | 2FWY                               | -10.7        | -10.7        | -10.7        | -10.7                 |
| 25 | 2H55                               | -10.7        | -10.7        | -10.7        | -10.7                 |
| 26 | 1UYC                               | -10.6        | -10.6        | -10.6        | -10.6                 |
| 27 | 1UYG                               | -10.6        | -10.6        | -10.6        | -10.6                 |
| 28 | 5FNC                               | -10.6        | -10.6        | -10.6        | -10.6                 |
| 29 | 1UYF                               | -10.4        | -10.4        | -10.4        | -10.4                 |
| 30 | 3FT8                               | -10.4        | -10.4        | -10.4        | -10.4                 |
| 31 | 1UY6                               | -10.4        | -10.3        | -10.3        | -10.3                 |
| 32 | 1UYD                               | -10.3        | -10.3        | -10.3        | -10.3                 |
| 33 | 1UYE                               | -10.3        | -10.3        | -10.3        | -10.3                 |
| 34 | 1UYH                               | -10.3        | -10.3        | -10.3        | -10.3                 |
| 35 | 1UYK                               | -10.3        | -10.3        | -10.3        | -10.3                 |

|    |      |       |       |       |       |
|----|------|-------|-------|-------|-------|
| 36 | 2FWZ | -10.3 | -10.3 | -10.3 | -10.3 |
| 37 | 1UYM | -10.2 | -10.2 | -10.2 | -10.2 |
| 38 | 4B0O | -9.7  | -9.7  | -9.7  | -9.7  |
| 39 | 5GT4 | -9.6  | -9.6  | -9.6  | -9.6  |
| 40 | 3IAI | -9.9  | -9.6  | -8.6  | -9.4  |
| 41 | 4BDS | -9.3  | -9.4  | -9.4  | -9.4  |
| 42 | 3LDQ | -9.3  | -9.4  | -9.4  | -9.4  |
| 43 | 1G1U | -9.3  | -9.6  | -9.3  | -9.4  |
| 44 | 1H9U | -9.4  | -9.4  | -9.4  | -9.4  |
| 45 | 2W5B | -9.4  | -9.4  | -9.4  | -9.4  |
| 46 | 3PP1 | -9.9  | -8.6  | -9.8  | -9.4  |
| 47 | 4MJH | -9.1  | -9.4  | -9.3  | -9.3  |
| 48 | 3O96 | -8.6  | -9.2  | -10   | -9.3  |
| 49 | 3UT3 | -9.1  | -9.5  | -9.2  | -9.3  |
| 50 | 2VQQ | -9.1  | -9.1  | -9.6  | -9.3  |
| 51 | 1M13 | -9.3  | -9.3  | -9.3  | -9.3  |
| 52 | 1P0I | -9.3  | -9.3  | -9.3  | -9.3  |
| 53 | 4TPK | -9.2  | -9.3  | -9.3  | -9.3  |
| 54 | 5GPG | -9.3  | -9.3  | -9.3  | -9.3  |
| 55 | 4C9X | -9.3  | -9.3  | -9.3  | -9.3  |
| 56 | 1KV2 | -9.3  | -9.3  | -9.3  | -9.3  |
| 57 | 1W22 | -9.2  | -9.2  | -9.2  | -9.2  |
| 58 | 2OC2 | -9.2  | -9.2  | -9.2  | -9.2  |
| 59 | 4NRE | -9.2  | -9.2  | -9.2  | -9.2  |
| 60 | 4R6A | -9.2  | -9.2  | -9.2  | -9.2  |
| 61 | 1Z6T | -8.9  | -9.3  | -9.3  | -9.2  |
| 62 | 3VI8 | -9.4  | -8.9  | -9.3  | -9.2  |
| 63 | 3MVH | -9.2  | -9.2  | -9.2  | -9.2  |
| 64 | 2X0W | -9.1  | -9.1  | -9.1  | -9.1  |
| 65 | 3SOS | -9.1  | -9.1  | -9.1  | -9.1  |
| 66 | 3EAH | -9.1  | -9.1  | -9.1  | -9.1  |
| 67 | 2V0M | -9.6  | -8.4  | -9.4  | -9.1  |
| 68 | 4D6Z | -9.2  | -9    | -9.2  | -9.1  |
| 69 | 3UA1 | -9.3  | -9.1  | -9    | -9.1  |
| 70 | 3W3N | -9.1  | -9.1  | -9.1  | -9.1  |
| 71 | 4QC0 | -9.1  | -9.1  | -9.1  | -9.1  |
| 72 | 3S95 | -9.1  | -9.1  | -9.1  | -9.1  |
| 73 | 3C4C | -9.1  | -9.1  | -9.1  | -9.1  |
| 74 | 1DB1 | -9.1  | -9.1  | -9.1  | -9.1  |
| 75 | 1PQ6 | -9.1  | -8.2  | -9.9  | -9.1  |
| 76 | 5IXS | -8.5  | -8.6  | -10.1 | -9.1  |

|     |      |      |      |       |      |
|-----|------|------|------|-------|------|
| 77  | 3UOK | -9   | -9   | -9    | -9   |
| 78  | 1SR7 | -8.3 | -9.4 | -9.4  | -9   |
| 79  | 4FYR | -9   | -9   | -9    | -9   |
| 80  | 1J8F | -9   | -9   | -9.1  | -9   |
| 81  | 3U4S | -8.9 | -9   | -9    | -9   |
| 82  | 5E6H | -9   | -9   | -9    | -9   |
| 83  | 3QKL | -9   | -9   | -9    | -9   |
| 84  | 3NXQ | -9   | -9   | -9    | -9   |
| 85  | 3QM4 | -9.4 | -9.3 | -8.3  | -9   |
| 86  | 4EY5 | -9   | -9   | -9    | -9   |
| 87  | 5K5E | -9   | -9.2 | -8.9  | -9   |
| 88  | 4R09 | -8.6 | -9.9 | -8.6  | -9   |
| 89  | 4C9W | -9   | -9   | -9    | -9   |
| 90  | 1YRP | -8.6 | -9.3 | -9.2  | -9   |
| 91  | 1NMS | -9   | -9   | -9    | -9   |
| 92  | 3EQM | -9   | -9   | -9    | -9   |
| 93  | 3LKJ | -9   | -9   | -9    | -9   |
| 94  | 4JPS | -9.2 | -8.8 | -8.9  | -9   |
| 95  | 3L0J | -8.7 | -9.2 | -9.2  | -9   |
| 96  | 4DOS | -8.9 | -9   | -9    | -9   |
| 97  | 4DQM | -7.5 | -8.9 | -10.6 | -9   |
| 98  | 2RKU | -9   | -9   | -9    | -9   |
| 99  | 2W1C | -9   | -9   | -9    | -9   |
| 100 | 2XRU | -9   | -9   | -9    | -9   |
| 101 | 5CSW | -9   | -9   | -9    | -9   |
| 102 | 4ASD | -8.9 | -8.9 | -8.9  | -8.9 |
| 103 | 3UO5 | -8.9 | -8.9 | -8.9  | -8.9 |
| 104 | 4C8B | -8.9 | -8.9 | -8.8  | -8.9 |
| 105 | 4K9W | -8.9 | -8.9 | -8.9  | -8.9 |
| 106 | 2VRL | -8.4 | -9.8 | -8.4  | -8.9 |
| 107 | 4D89 | -8.9 | -8.9 | -8.9  | -8.9 |
| 108 | 4EY6 | -9   | -8.9 | -8.9  | -8.9 |
| 109 | 3E7G | -8.6 | -8.8 | -9.4  | -8.9 |
| 110 | 3W3K | -8.9 | -8.9 | -8.9  | -8.9 |
| 111 | 2H7C | -8.9 | -8.9 | -8.9  | -8.9 |
| 112 | 2J3N | -9   | -8.9 | -8.8  | -8.9 |
| 113 | 3ZR0 | -8.9 | -8.9 | -8.9  | -8.9 |
| 114 | 5KXA | -9.6 | -9.5 | -7.6  | -8.9 |
| 115 | 1G5Y | -9.1 | -9.1 | -8.6  | -8.9 |
| 116 | 1YOK | -8.9 | -9   | -8.9  | -8.9 |
| 117 | 3D24 | -8.8 | -8.9 | -8.9  | -8.9 |

|     |      |      |       |       |      |
|-----|------|------|-------|-------|------|
| 118 | 3KYT | -8.9 | -8.9  | -8.9  | -8.9 |
| 119 | 4UDC | -9.3 | -9.3  | -8    | -8.9 |
| 120 | 2UW9 | -8.9 | -8.9  | -8.9  | -8.9 |
| 121 | 3VHE | -8.8 | -8.8  | -8.8  | -8.8 |
| 122 | 3OCB | -8.8 | -8.8  | -8.8  | -8.8 |
| 123 | 2W8Y | -8.8 | -8.8  | -8.8  | -8.8 |
| 124 | 1AO6 | -8.2 | -8.9  | -9.2  | -8.8 |
| 125 | 3L9N | -9.3 | -9.3  | -7.7  | -8.8 |
| 126 | 1OJC | -10  | -8.2  | -8.2  | -8.8 |
| 127 | 2C66 | -8.4 | -9.5  | -8.5  | -8.8 |
| 128 | 2V60 | -8.1 | -8.1  | -10.1 | -8.8 |
| 129 | 4FVT | -8.8 | -8.9  | -8.8  | -8.8 |
| 130 | 4PZW | -8.8 | -8.8  | -8.8  | -8.8 |
| 131 | 4R08 | -8.8 | -8.8  | -8.7  | -8.8 |
| 132 | 5AWB | -8.8 | -8.8  | -8.8  | -8.8 |
| 133 | 1HK1 | -8.8 | -8.8  | -8.9  | -8.8 |
| 134 | 1HK2 | -8.8 | -8.8  | -8.8  | -8.8 |
| 135 | 1HK5 | -7.9 | -10.1 | -8.5  | -8.8 |
| 136 | 4B3E | -9.2 | -8.7  | -8.6  | -8.8 |
| 137 | 3KVW | -8.8 | -8.8  | -8.8  | -8.8 |
| 138 | 4TUH | -8.9 | -8.5  | -9.1  | -8.8 |
| 139 | 4WVT | -8.8 | -8.8  | -8.8  | -8.8 |
| 140 | 1CBS | -9.4 | -7.6  | -9.4  | -8.8 |
| 141 | 1I7I | -8.8 | -8.8  | -8.8  | -8.8 |
| 142 | 1NRL | -8.4 | -9.5  | -8.4  | -8.8 |
| 143 | 1XAP | -9.5 | -7.5  | -9.4  | -8.8 |
| 144 | 2XYW | -9.5 | -9.5  | -7.4  | -8.8 |
| 145 | 3PLZ | -8.8 | -8.8  | -8.7  | -8.8 |
| 146 | 2PVR | -8.8 | -8.8  | -8.8  | -8.8 |
| 147 | 5KDI | -8.7 | -8.7  | -8.7  | -8.7 |
| 148 | 2OK5 | -8.6 | -8.9  | -8.6  | -8.7 |
| 149 | 3L54 | -8.7 | -8.6  | -8.7  | -8.7 |
| 150 | 1E3K | -8.8 | -8.7  | -8.7  | -8.7 |
| 151 | 3RUK | -8.7 | -8.6  | -8.7  | -8.7 |
| 152 | 4XRY | -8.3 | -8.9  | -8.9  | -8.7 |
| 153 | 4A7A | -8.5 | -9.4  | -8.1  | -8.7 |
| 154 | 4B0Q | -8.7 | -8.7  | -8.7  | -8.7 |
| 155 | 4EY4 | -8.7 | -8.7  | -8.7  | -8.7 |
| 156 | 4EY7 | -8.7 | -8.7  | -8.6  | -8.7 |
| 157 | 2AZ5 | -8.7 | -8.7  | -8.7  | -8.7 |
| 158 | 5HDH | -7.8 | -9.1  | -9.1  | -8.7 |

|     |      |      |      |      |      |
|-----|------|------|------|------|------|
| 159 | 1HK3 | -8.9 | -8.4 | -8.9 | -8.7 |
| 160 | 3Q93 | -8.2 | -9   | -9   | -8.7 |
| 161 | 5TQ3 | -8.5 | -9.2 | -8.5 | -8.7 |
| 162 | 1X7E | -8.7 | -8.7 | -8.8 | -8.7 |
| 163 | 2YXJ | -8.7 | -8.7 | -8.7 | -8.7 |
| 164 | 4QVX | -8.7 | -8.7 | -8.7 | -8.7 |
| 165 | 1KV6 | -9.3 | -9.3 | -7.6 | -8.7 |
| 166 | 2GL8 | -9.4 | -8.4 | -8.4 | -8.7 |
| 167 | 2PIN | -8.7 | -8.7 | -8.7 | -8.7 |
| 168 | 3BEJ | -8.9 | -8.6 | -8.6 | -8.7 |
| 169 | 3IPS | -8.6 | -8.7 | -8.7 | -8.7 |
| 170 | 5G3J | -9.1 | -7.9 | -9.1 | -8.7 |
| 171 | 1DHT | -8.7 | -8.7 | -8.7 | -8.7 |
| 172 | 4AG8 | -8.6 | -8.6 | -8.6 | -8.6 |
| 173 | 1ZUC | -8.4 | -8.9 | -8.4 | -8.6 |
| 174 | 2OL2 | -8.6 | -8.6 | -8.6 | -8.6 |
| 175 | 3IJE | -7.6 | -9.1 | -9.1 | -8.6 |
| 176 | 4LXZ | -9   | -7.9 | -9   | -8.6 |
| 177 | 4L02 | -8.6 | -8.6 | -8.6 | -8.6 |
| 178 | 3QU8 | -8.2 | -9   | -8.6 | -8.6 |
| 179 | 4W9P | -8.6 | -8.6 | -8.6 | -8.6 |
| 180 | 1NSI | -8.5 | -8.4 | -8.8 | -8.6 |
| 181 | 3KMC | -8.6 | -8.6 | -8.6 | -8.6 |
| 182 | 4R07 | -8.8 | -8.6 | -8.3 | -8.6 |
| 183 | 2H79 | -8.6 | -8.6 | -8.6 | -8.6 |
| 184 | 2ZZ0 | -8.6 | -8.5 | -8.6 | -8.6 |
| 185 | 4NOS | -8.7 | -8.6 | -8.6 | -8.6 |
| 186 | 2W3L | -8.6 | -8.6 | -8.6 | -8.6 |
| 187 | 1K7L | -8.9 | -8   | -8.9 | -8.6 |
| 188 | 3D6D | -8.3 | -9.1 | -8.3 | -8.6 |
| 189 | 2PPL | -7.7 | -8.9 | -8.9 | -8.5 |
| 190 | 3KCG | -8   | -8.8 | -8.8 | -8.5 |
| 191 | 3MAX | -8.5 | -8.5 | -8.5 | -8.5 |
| 192 | 3ZNS | -8   | -8.7 | -8.7 | -8.5 |
| 193 | 4GU0 | -8.4 | -8.6 | -8.5 | -8.5 |
| 194 | 2OJI | -8.5 | -8.5 | -8.5 | -8.5 |
| 195 | 3PM0 | -8.3 | -8.3 | -9   | -8.5 |
| 196 | 1J1A | -8.5 | -8.4 | -8.7 | -8.5 |
| 197 | 1LYW | -8.5 | -8.5 | -8.5 | -8.5 |
| 198 | 2BYB | -8   | -9.4 | -8   | -8.5 |
| 199 | 2Z5X | -8.5 | -8.5 | -8.5 | -8.5 |

|     |      |      |       |      |      |
|-----|------|------|-------|------|------|
| 200 | 2FV5 | -8.5 | -8.5  | -8.5 | -8.5 |
| 201 | 3W3G | -8.4 | -8.4  | -8.6 | -8.5 |
| 202 | 3W3J | -8.5 | -8.5  | -8.5 | -8.5 |
| 203 | 4QBZ | -8.5 | -8.5  | -8.5 | -8.5 |
| 204 | 5ANT | -8.6 | -8.2  | -8.6 | -8.5 |
| 205 | 1GUL | -8.5 | -8.5  | -8.5 | -8.5 |
| 206 | 2JLP | -8.3 | -8.6  | -8.6 | -8.5 |
| 207 | 2VWI | -8.5 | -8.5  | -8.5 | -8.5 |
| 208 | 1EF1 | -8.5 | -8.5  | -8.5 | -8.5 |
| 209 | 1MAZ | -8.5 | -8.5  | -8.5 | -8.5 |
| 210 | 2CKE | -8.8 | -8.3  | -8.4 | -8.5 |
| 211 | 2XYJ | -8.5 | -8.5  | -8.5 | -8.5 |
| 212 | 3T03 | -8.5 | -8.5  | -8.6 | -8.5 |
| 213 | 4EMA | -8.5 | -8.5  | -8.5 | -8.5 |
| 214 | 4PVU | -8.5 | -8.5  | -8.5 | -8.5 |
| 215 | 4UDD | -8.7 | -8.4  | -8.4 | -8.5 |
| 216 | 4J8M | -8.5 | -8.5  | -8.5 | -8.5 |
| 217 | 1FLT | -8.4 | -8.4  | -8.5 | -8.4 |
| 218 | 4XCT | -8.4 | -8.4  | -8.4 | -8.4 |
| 219 | 5JFR | -8.4 | -8.4  | -8.4 | -8.4 |
| 220 | 2BT0 | -8.4 | -8.4  | -8.4 | -8.4 |
| 221 | 2P3T | -8.4 | -8.4  | -8.4 | -8.4 |
| 222 | 3D90 | -7.6 | -8.8  | -8.9 | -8.4 |
| 223 | 2D0T | -8.3 | -8.4  | -8.4 | -8.4 |
| 224 | 3G0E | -8.4 | -8.4  | -8.4 | -8.4 |
| 225 | 4ACG | -8.4 | -8.4  | -8.4 | -8.4 |
| 226 | 4OGH | -8.4 | -8.4  | -8.4 | -8.4 |
| 227 | 2C67 | -8.1 | -9    | -8.1 | -8.4 |
| 228 | 2WJO | -8.4 | -8.4  | -8.4 | -8.4 |
| 229 | 3HOK | -8.5 | -7.6  | -9.1 | -8.4 |
| 230 | 3ZR1 | -8.4 | -8.4  | -8.3 | -8.4 |
| 231 | 3NMM | -8.4 | -8.4  | -8.4 | -8.4 |
| 232 | 1LV2 | -8.4 | -8.4  | -8.4 | -8.4 |
| 233 | 1OVL | -8.6 | -8.6  | -8.1 | -8.4 |
| 234 | 3OLL | -8.4 | -8.4  | -8.4 | -8.4 |
| 235 | 4MG5 | -8.7 | -8.7  | -7.9 | -8.4 |
| 236 | 4MG7 | -7.7 | -8.4  | -9.2 | -8.4 |
| 237 | 4JNK | -7.6 | -10.1 | -7.6 | -8.4 |
| 238 | 4QTD | -8.4 | -8.4  | -8.4 | -8.4 |
| 239 | 5UG8 | -8.4 | -8.4  | -8.4 | -8.4 |
| 240 | 2QG2 | -8.8 | -8.1  | -8.1 | -8.3 |

|     |      |      |      |      |      |
|-----|------|------|------|------|------|
| 241 | 1DQA | -8.3 | -8.3 | -8.2 | -8.3 |
| 242 | 4ASK | -8.3 | -8.4 | -8.1 | -8.3 |
| 243 | 3C0Z | -8.3 | -8.3 | -8.4 | -8.3 |
| 244 | 1SJ0 | -8.2 | -8.2 | -8.4 | -8.3 |
| 245 | 1ZYJ | -8.3 | -8.3 | -8.3 | -8.3 |
| 246 | 4ASX | -8.3 | -8.3 | -8.3 | -8.3 |
| 247 | 4DYM | -8.5 | -8.2 | -8.2 | -8.3 |
| 248 | 4IDT | -8.2 | -8.4 | -8.3 | -8.3 |
| 249 | 4OYA | -8.1 | -8.8 | -8.1 | -8.3 |
| 250 | 3UA5 | -8.4 | -8   | -8.5 | -8.3 |
| 251 | 3F6K | -8.7 | -7.5 | -8.7 | -8.3 |
| 252 | 1Q5K | -7.8 | -9.2 | -8   | -8.3 |
| 253 | 1ZXC | -7.9 | -9.2 | -7.9 | -8.3 |
| 254 | 3L0V | -8.3 | -8.4 | -8.3 | -8.3 |
| 255 | 3W3L | -8.3 | -8.3 | -8.3 | -8.3 |
| 256 | 1HK4 | -8.1 | -8.1 | -8.8 | -8.3 |
| 257 | 1ICT | -8.3 | -8.4 | -8.3 | -8.3 |
| 258 | 1AWI | -8.3 | -8.3 | -8.3 | -8.3 |
| 259 | 1IG1 | -8.3 | -8.3 | -8.3 | -8.3 |
| 260 | 2DUX | -8.3 | -8.3 | -8.2 | -8.3 |
| 261 | 2XIR | -8.3 | -8.3 | -8.3 | -8.3 |
| 262 | 1NAX | -8.3 | -8.3 | -8.3 | -8.3 |
| 263 | 3CDS | -7.5 | -8.3 | -9.2 | -8.3 |
| 264 | 4EM9 | -8.4 | -8.4 | -8.1 | -8.3 |
| 265 | 4IS8 | -7.9 | -8.6 | -8.5 | -8.3 |
| 266 | 4MG6 | -8.5 | -8.2 | -8.2 | -8.3 |
| 267 | 4OAR | -8.3 | -8.3 | -8.3 | -8.3 |
| 268 | 4UDB | -9.1 | -8.2 | -7.6 | -8.3 |
| 269 | 1CG6 | -8.3 | -8.2 | -8.3 | -8.3 |
| 270 | 1J1B | -8.3 | -9.5 | -7.2 | -8.3 |
| 271 | 2WGJ | -7.3 | -8.7 | -9   | -8.3 |
| 272 | 3EQH | -8.3 | -8.3 | -8.3 | -8.3 |
| 273 | 3VVH | -8.4 | -8.2 | -8.4 | -8.3 |
| 274 | 3HNG | -8.2 | -8.2 | -8.2 | -8.2 |
| 275 | 4WUA | -8.2 | -8.2 | -8.2 | -8.2 |
| 276 | 1SQN | -8.2 | -8.2 | -8.1 | -8.2 |
| 277 | 3EKO | -8.3 | -8   | -8.2 | -8.2 |
| 278 | 3EKR | -8.4 | -7.7 | -8.4 | -8.2 |
| 279 | 3K97 | -8.2 | -8.1 | -8.2 | -8.2 |
| 280 | 1JMJ | -8.2 | -8.2 | -8.2 | -8.2 |
| 281 | 2GS6 | -8.2 | -8.2 | -8.2 | -8.2 |

|     |      |      |      |      |      |
|-----|------|------|------|------|------|
| 282 | 3SOR | -8.5 | -7.1 | -9   | -8.2 |
| 283 | 4NA7 | -8.2 | -8.2 | -8.2 | -8.2 |
| 284 | 2Q8E | -8.7 | -8   | -7.8 | -8.2 |
| 285 | 3V6R | -8.3 | -8.3 | -8.1 | -8.2 |
| 286 | 3ZEP | -8.6 | -8.2 | -7.9 | -8.2 |
| 287 | 2XZT | -8.2 | -8.2 | -8.2 | -8.2 |
| 288 | 1BX4 | -8.1 | -8.1 | -8.5 | -8.2 |
| 289 | 2V5Z | -8.2 | -8.2 | -8.2 | -8.2 |
| 290 | 2OVX | -8.2 | -8.2 | -8.2 | -8.2 |
| 291 | 2PRG | -8   | -8.3 | -8.3 | -8.2 |
| 292 | 3W3M | -8.7 | -8   | -8   | -8.2 |
| 293 | 4R0A | -8.5 | -8.1 | -8.1 | -8.2 |
| 294 | 2PLL | -8.2 | -8.2 | -8.2 | -8.2 |
| 295 | 4N1U | -8.6 | -8   | -8   | -8.2 |
| 296 | 1GUM | -8.2 | -8.2 | -8.2 | -8.2 |
| 297 | 17GS | -8.2 | -8.2 | -8.2 | -8.2 |
| 298 | 3ZLN | -8.2 | -8.2 | -8.2 | -8.2 |
| 299 | 1A52 | -7.4 | -9.2 | -8   | -8.2 |
| 300 | 1KKQ | -8   | -8   | -8.7 | -8.2 |
| 301 | 2QW4 | -8.2 | -8.2 | -8.2 | -8.2 |
| 302 | 3B3K | -7.4 | -7.4 | -9.7 | -8.2 |
| 303 | 4MG9 | -8.1 | -8.2 | -8.2 | -8.2 |
| 304 | 4MGB | -7.8 | -7.9 | -8.9 | -8.2 |
| 305 | 4PRG | -8.4 | -8.2 | -8   | -8.2 |
| 306 | 4PWL | -8.2 | -8.2 | -8.2 | -8.2 |
| 307 | 5KYJ | -8.2 | -8.2 | -8.3 | -8.2 |
| 308 | 3EQC | -8.2 | -8.2 | -8.2 | -8.2 |
| 309 | 3FGU | -8.2 | -8.2 | -8.2 | -8.2 |
| 310 | 3OWD | -8.2 | -8.2 | -8.2 | -8.2 |
| 311 | 5C91 | -8.2 | -8.2 | -8.2 | -8.2 |
| 312 | 3PTA | -8.5 | -8   | -8.1 | -8.2 |
| 313 | 1A28 | -7.6 | -8.3 | -8.3 | -8.1 |
| 314 | 3BMY | -8.1 | -8.1 | -8.1 | -8.1 |
| 315 | 3D9I | -7.6 | -8.4 | -8.4 | -8.1 |
| 316 | 4CR5 | -8.2 | -8.1 | -8   | -8.1 |
| 317 | 3C10 | -7.9 | -8.2 | -8.2 | -8.1 |
| 318 | 4FWF | -8.1 | -8.1 | -8   | -8.1 |
| 319 | 3QX3 | -6.6 | -8.9 | -8.9 | -8.1 |
| 320 | 1S3E | -8   | -8.1 | -8.1 | -8.1 |
| 321 | 2PD5 | -7.4 | -8.4 | -8.4 | -8.1 |
| 322 | 2VRM | -8.1 | -8   | -8.3 | -8.1 |

|     |      |      |      |      |      |
|-----|------|------|------|------|------|
| 323 | 3UIU | -8.1 | -8.1 | -8.1 | -8.1 |
| 324 | 4B70 | -8.1 | -8.1 | -8.1 | -8.1 |
| 325 | 4I0F | -8   | -8.1 | -8.1 | -8.1 |
| 326 | 4TW8 | -8   | -8   | -8.2 | -8.1 |
| 327 | 3G42 | -8   | -8.1 | -8.2 | -8.1 |
| 328 | 3LE9 | -7.7 | -8.3 | -8.2 | -8.1 |
| 329 | 2XN6 | -8.1 | -8.1 | -8.1 | -8.1 |
| 330 | 1JKL | -8   | -8.1 | -8.1 | -8.1 |
| 331 | 1X78 | -8   | -8.1 | -8.1 | -8.1 |
| 332 | 2VPF | -8.2 | -8.3 | -7.9 | -8.1 |
| 333 | 1ERR | -8.4 | -8.4 | -7.6 | -8.1 |
| 334 | 1FM9 | -7.9 | -8.8 | -7.6 | -8.1 |
| 335 | 1P93 | -8.2 | -7.9 | -8.3 | -8.1 |
| 336 | 3LBD | -7.4 | -9.4 | -7.4 | -8.1 |
| 337 | 3VJI | -8.2 | -8.1 | -8.1 | -8.1 |
| 338 | 4HLW | -8   | -8   | -8.4 | -8.1 |
| 339 | 1KE8 | -8.1 | -8.1 | -8.1 | -8.1 |
| 340 | 1NFI | -8.1 | -8.1 | -8.2 | -8.1 |
| 341 | 3E8N | -8.4 | -7.9 | -7.9 | -8.1 |
| 342 | 4R3C | -8.2 | -8.1 | -8.1 | -8.1 |
| 343 | 5TWZ | -8   | -8.1 | -8   | -8   |
| 344 | 2BYI | -8.4 | -8.4 | -7.1 | -8   |
| 345 | 2QG0 | -8   | -8   | -8   | -8   |
| 346 | 3JXU | -7.9 | -8   | -8   | -8   |
| 347 | 5J20 | -7   | -7.2 | -9.8 | -8   |
| 348 | 1TB6 | -8.3 | -7.4 | -8.3 | -8   |
| 349 | 2J4I | -8   | -8   | -8   | -8   |
| 350 | 3NXP | -8   | -8   | -8   | -8   |
| 351 | 4BTI | -7.9 | -8.1 | -7.9 | -8   |
| 352 | 4D76 | -8.2 | -7.7 | -8.2 | -8   |
| 353 | 5TKS | -8   | -8   | -8.1 | -8   |
| 354 | 3SWR | -7.5 | -7.4 | -9   | -8   |
| 355 | 1D5R | -8   | -8.1 | -8   | -8   |
| 356 | 2HXL | -8.5 | -7.7 | -7.7 | -8   |
| 357 | 3TXO | -7.8 | -7.8 | -8.3 | -8   |
| 358 | 1TNF | -8.2 | -7.7 | -8.2 | -8   |
| 359 | 3QOA | -8.4 | -7.1 | -8.4 | -8   |
| 360 | 1OJA | -7.9 | -7.9 | -8.2 | -8   |
| 361 | 1S3B | -8   | -8   | -8   | -8   |
| 362 | 2C64 | -7.9 | -8   | -8.1 | -8   |
| 363 | 2C65 | -8.3 | -7.9 | -7.8 | -8   |

|     |      |      |      |      |      |
|-----|------|------|------|------|------|
| 364 | 2OKK | -7.9 | -8.2 | -7.9 | -8   |
| 365 | 2V61 | -8   | -8   | -8   | -8   |
| 366 | 2Z5Y | -8   | -8   | -8   | -8   |
| 367 | 3UYT | -7.5 | -8.3 | -8.3 | -8   |
| 368 | 3ZGV | -7.9 | -7.7 | -8.5 | -8   |
| 369 | 3MDY | -8.2 | -7.8 | -8.1 | -8   |
| 370 | 2OW1 | -8   | -8   | -8   | -8   |
| 371 | 3WN4 | -8   | -8   | -8   | -8   |
| 372 | 5AWD | -7.9 | -8.1 | -8.1 | -8   |
| 373 | 2H77 | -8   | -8   | -8   | -8   |
| 374 | 2RIW | -8   | -8   | -8   | -8   |
| 375 | 1DCY | -8   | -8   | -8   | -8   |
| 376 | 2X4Z | -8   | -8   | -8   | -8   |
| 377 | 1L6J | -7.8 | -8.3 | -7.8 | -8   |
| 378 | 1NMQ | -8   | -8   | -8   | -8   |
| 379 | 1QDU | -8.4 | -8.4 | -7.2 | -8   |
| 380 | 3MUP | -8   | -8   | -8   | -8   |
| 381 | 4KMP | -8   | -8   | -8   | -8   |
| 382 | 4MAN | -7.9 | -8   | -8   | -8   |
| 383 | 3GWX | -8.2 | -7.7 | -8.2 | -8   |
| 384 | 3GZ9 | -8   | -7.9 | -8   | -8   |
| 385 | 3VJH | -8.1 | -7.8 | -8   | -8   |
| 386 | 4DM6 | -8.3 | -8.3 | -7.5 | -8   |
| 387 | 4MG8 | -7.8 | -7.8 | -8.4 | -8   |
| 388 | 4MGA | -8   | -8   | -7.9 | -8   |
| 389 | 1OL6 | -8.4 | -7.2 | -8.3 | -8   |
| 390 | 2GS2 | -8   | -8   | -7.9 | -8   |
| 391 | 3JS2 | -7.9 | -7.9 | -7.9 | -7.9 |
| 392 | 4WZV | -7.9 | -7.9 | -7.9 | -7.9 |
| 393 | 5NJK | -7.9 | -8   | -7.7 | -7.9 |
| 394 | 1OSF | -7.9 | -7.9 | -8   | -7.9 |
| 395 | 1UYI | -7.9 | -7.9 | -7.9 | -7.9 |
| 396 | 1DAN | -7.5 | -8.1 | -8.1 | -7.9 |
| 397 | 2BOH | -7.9 | -7.9 | -7.9 | -7.9 |
| 398 | 3BG8 | -7.9 | -8   | -7.9 | -7.9 |
| 399 | 3DY7 | -7.9 | -7.9 | -7.9 | -7.9 |
| 400 | 3SW2 | -7.9 | -7.9 | -7.9 | -7.9 |
| 401 | 4EKG | -8   | -7.6 | -8   | -7.9 |
| 402 | 4LY1 | -7.9 | -7.9 | -7.9 | -7.9 |
| 403 | 2H94 | -8   | -7.6 | -8.2 | -7.9 |
| 404 | 1OI9 | -7.9 | -7.9 | -7.8 | -7.9 |

|     |        |      |      |      |      |
|-----|--------|------|------|------|------|
| 405 | 2BUJ   | -8.1 | -7.8 | -7.7 | -7.9 |
| 406 | 1OJ9   | -7.9 | -7.9 | -7.9 | -7.9 |
| 407 | 1S2Q   | -7.6 | -7.6 | -8.5 | -7.9 |
| 408 | 1S2Y   | -7.9 | -8   | -7.9 | -7.9 |
| 409 | 2FDV   | -7.9 | -7.9 | -8   | -7.9 |
| 410 | 3INH   | -7.9 | -7.9 | -7.9 | -7.9 |
| 411 | 4OM7   | -7.9 | -8   | -7.9 | -7.9 |
| 412 | 1Z7J   | -7.9 | -7.9 | -7.9 | -7.9 |
| 413 | 5ANW   | -7.9 | -7.9 | -7.9 | -7.9 |
| 414 | 4BEX   | -7.9 | -7.9 | -7.9 | -7.9 |
| 415 | 2Y1L   | -7.9 | -7.9 | -7.9 | -7.9 |
| 416 | 3NPC   | -9   | -7.4 | -7.4 | -7.9 |
| 417 | 4IEH   | -7.9 | -7.9 | -7.9 | -7.9 |
| 418 | 3CDP   | -8.3 | -7.6 | -7.9 | -7.9 |
| 419 | 3HOD   | -7.9 | -7.9 | -7.9 | -7.9 |
| 420 | 3OLS   | -7.8 | -8.1 | -7.8 | -7.9 |
| 421 | 1GIH   | -7.9 | -7.9 | -8   | -7.9 |
| 422 | 3ZXZ   | -8.4 | -8.3 | -7.1 | -7.9 |
| 423 | 4ZSA   | -7.9 | -7.9 | -7.9 | -7.9 |
| 424 | 2P4I_B | -7.5 | -8   | -7.9 | -7.8 |
| 425 | 4BB4   | -7.8 | -7.8 | -7.8 | -7.8 |
| 426 | 2BZ5   | -7.8 | -7.8 | -7.8 | -7.8 |
| 427 | 3HHU   | -7.9 | -7.6 | -7.9 | -7.8 |
| 428 | 5J6N   | -7.8 | -7.8 | -7.8 | -7.8 |
| 429 | 5UCH   | -7.8 | -7.8 | -7.7 | -7.8 |
| 430 | 6ASY   | -7.4 | -8   | -8   | -7.8 |
| 431 | 2FDA   | -7.8 | -7.8 | -7.8 | -7.8 |
| 432 | 2W26   | -7.8 | -7.8 | -7.8 | -7.8 |
| 433 | 4JZF   | -7.8 | -7.8 | -7.8 | -7.8 |
| 434 | 4NA8   | -7.8 | -7.8 | -7.8 | -7.8 |
| 435 | 2QRV   | -7.7 | -7.7 | -7.9 | -7.8 |
| 436 | 1U4D   | -7.6 | -7.6 | -8.3 | -7.8 |
| 437 | 3P1D   | -7.8 | -7.8 | -7.8 | -7.8 |
| 438 | 4WT2   | -7.8 | -7.8 | -7.8 | -7.8 |
| 439 | 2YDV   | -7.7 | -7.8 | -7.8 | -7.8 |
| 440 | 1DTW   | -7.8 | -7.8 | -7.8 | -7.8 |
| 441 | 2BK3   | -7.6 | -8   | -7.9 | -7.8 |
| 442 | 3F88   | -7.8 | -7.8 | -7.8 | -7.8 |
| 443 | 1FKG   | -7.8 | -7.8 | -7.8 | -7.8 |
| 444 | 2ZK1   | -8   | -7.5 | -8   | -7.8 |
| 445 | 1ETB   | -7.8 | -7.8 | -7.8 | -7.8 |

|     |        |      |      |      |      |
|-----|--------|------|------|------|------|
| 446 | 3GWS   | -7.8 | -7.8 | -7.8 | -7.8 |
| 447 | 4LNW   | -7.8 | -7.8 | -7.8 | -7.8 |
| 448 | 4LNX   | -7.8 | -7.8 | -7.8 | -7.8 |
| 449 | 3TH5   | -7.8 | -7.8 | -7.8 | -7.8 |
| 450 | 5UAK   | -7.5 | -8.2 | -7.7 | -7.8 |
| 451 | 121P   | -7.8 | -7.9 | -7.6 | -7.8 |
| 452 | 1I3O   | -7.8 | -7.8 | -7.8 | -7.8 |
| 453 | 3QD6   | -7.7 | -7.9 | -7.9 | -7.8 |
| 454 | 1BSX   | -7.8 | -7.8 | -7.8 | -7.8 |
| 455 | 1FCX   | -7.7 | -8.1 | -7.7 | -7.8 |
| 456 | 1FD0   | -7.5 | -7.5 | -8.4 | -7.8 |
| 457 | 1GWX   | -7.8 | -7.8 | -7.8 | -7.8 |
| 458 | 2BAW   | -7.8 | -7.8 | -7.8 | -7.8 |
| 459 | 2J14   | -7.8 | -7.7 | -7.8 | -7.8 |
| 460 | 3BQD   | -7.4 | -7.4 | -8.6 | -7.8 |
| 461 | 3U9Q   | -8.3 | -8   | -7   | -7.8 |
| 462 | 4MGD   | -7.7 | -7.8 | -7.8 | -7.8 |
| 463 | 1ZYS   | -7.8 | -7.8 | -7.8 | -7.8 |
| 464 | 3MBL   | -7.1 | -7.1 | -9.3 | -7.8 |
| 465 | 3ZME   | -8.2 | -7.1 | -8.2 | -7.8 |
| 466 | 4ZZN   | -7.8 | -7.8 | -7.8 | -7.8 |
| 467 | 5HG8   | -7.8 | -7.8 | -7.8 | -7.8 |
| 468 | 2P4I_A | -7.8 | -7.6 | -7.8 | -7.7 |
| 469 | 1YC3   | -7.4 | -7.8 | -7.8 | -7.7 |
| 470 | 1YET   | -7.7 | -7.7 | -7.7 | -7.7 |
| 471 | 2BYH   | -7.3 | -8   | -7.9 | -7.7 |
| 472 | 1HCG   | -7.8 | -7.7 | -7.6 | -7.7 |
| 473 | 2Y7X   | -7.7 | -7.7 | -7.7 | -7.7 |
| 474 | 3IIT   | -7.7 | -7.7 | -7.7 | -7.7 |
| 475 | 3OS3   | -7.7 | -7.7 | -7.7 | -7.7 |
| 476 | 1T64   | -7.7 | -7.7 | -7.7 | -7.7 |
| 477 | 2HK5   | -7.7 | -7.7 | -7.7 | -7.7 |
| 478 | 3UNJ   | -7.7 | -7.7 | -7.7 | -7.7 |
| 479 | 3W33   | -7.4 | -7.8 | -7.8 | -7.7 |
| 480 | 4EBV   | -7.7 | -7.8 | -7.5 | -7.7 |
| 481 | 4R7H   | -7.2 | -7.5 | -8.3 | -7.7 |
| 482 | 2I47   | -7.4 | -7.4 | -8.2 | -7.7 |
| 483 | 3F17   | -7.6 | -7.7 | -7.7 | -7.7 |
| 484 | 3J0A   | -8.1 | -7.4 | -7.5 | -7.7 |
| 485 | 1ETA   | -7.8 | -7.8 | -7.4 | -7.7 |
| 486 | 1XZX   | -7.7 | -7.7 | -7.7 | -7.7 |

|     |      |      |      |      |      |
|-----|------|------|------|------|------|
| 487 | 1Y0X | -7.7 | -7.7 | -7.7 | -7.7 |
| 488 | 2CEO | -7.6 | -8   | -7.6 | -7.7 |
| 489 | 3KIJ | -7.7 | -7.7 | -7.7 | -7.7 |
| 490 | 2XIK | -7.7 | -7.7 | -7.7 | -7.7 |
| 491 | 3ODW | -7.7 | -7.7 | -7.6 | -7.7 |
| 492 | 1RWW | -7.7 | -7.7 | -7.7 | -7.7 |
| 493 | 3DEH | -7.7 | -7.8 | -7.7 | -7.7 |
| 494 | 5IEZ | -7.7 | -7.7 | -7.7 | -7.7 |
| 495 | 1FBY | -7.8 | -7.8 | -7.5 | -7.7 |
| 496 | 1QKU | -7.8 | -7.3 | -7.9 | -7.7 |
| 497 | 2XYX | -8.5 | -7.3 | -7.3 | -7.7 |
| 498 | 3JZC | -7.7 | -7.7 | -7.7 | -7.7 |
| 499 | 4DM8 | -7.4 | -8.4 | -7.4 | -7.7 |
| 500 | 4MGC | -7.8 | -7.2 | -8   | -7.7 |
| 501 | 1MCH | -7.7 | -7.7 | -7.7 | -7.7 |
| 502 | 2ITP | -7.6 | -7.6 | -7.8 | -7.7 |
| 503 | 2XP2 | -7.7 | -7.6 | -7.7 | -7.7 |
| 504 | 4EK4 | -7.7 | -7.7 | -7.7 | -7.7 |
| 505 | 1M17 | -7.6 | -7.6 | -7.6 | -7.6 |
| 506 | 1F9Q | -7.7 | -7.5 | -7.5 | -7.6 |
| 507 | 4A7I | -7.7 | -7.7 | -7.3 | -7.6 |
| 508 | 4AJU | -7.6 | -7.6 | -7.5 | -7.6 |
| 509 | 4DY0 | -7.6 | -7.6 | -7.6 | -7.6 |
| 510 | 3F07 | -8.6 | -7.1 | -7.1 | -7.6 |
| 511 | 3PP0 | -7.6 | -7.5 | -7.6 | -7.6 |
| 512 | 4WH9 | -7.5 | -7.7 | -7.7 | -7.6 |
| 513 | 4DVF | -7.6 | -7.6 | -7.6 | -7.6 |
| 514 | 3TKM | -7.6 | -7.6 | -7.6 | -7.6 |
| 515 | 1F86 | -7.4 | -7.9 | -7.4 | -7.6 |
| 516 | 2PIW | -8.1 | -8.1 | -6.7 | -7.6 |
| 517 | 2ROX | -7.6 | -7.6 | -7.6 | -7.6 |
| 518 | 1A4R | -7.8 | -7.2 | -7.8 | -7.6 |
| 519 | 1RGP | -7.6 | -7.6 | -7.6 | -7.6 |
| 520 | 4MXO | -7.7 | -7.7 | -7.5 | -7.6 |
| 521 | 4Q9S | -7.6 | -7.6 | -7.6 | -7.6 |
| 522 | 1CP3 | -7.6 | -7.6 | -7.6 | -7.6 |
| 523 | 1YWT | -7.6 | -7.6 | -7.6 | -7.6 |
| 524 | 2ZJW | -7.4 | -8   | -7.4 | -7.6 |
| 525 | 3GGF | -7.6 | -7.6 | -7.6 | -7.6 |
| 526 | 3VW6 | -7.1 | -7.9 | -7.7 | -7.6 |
| 527 | 3ILZ | -7.6 | -7.6 | -7.5 | -7.6 |

|     |      |      |      |      |      |
|-----|------|------|------|------|------|
| 528 | 4TV1 | -7.5 | -7.8 | -7.5 | -7.6 |
| 529 | 1BJ4 | -7.6 | -7.6 | -7.6 | -7.6 |
| 530 | 1Z57 | -7.3 | -8.3 | -7.3 | -7.6 |
| 531 | 2ITW | -7.6 | -7.5 | -7.6 | -7.6 |
| 532 | 2ITZ | -7.3 | -7.2 | -8.4 | -7.6 |
| 533 | 2QON | -7.1 | -7.8 | -7.8 | -7.6 |
| 534 | 3LQ8 | -7.8 | -7.6 | -7.5 | -7.6 |
| 535 | 1GJO | -7.5 | -7.5 | -7.5 | -7.5 |
| 536 | 4U7T | -7.1 | -7.5 | -7.9 | -7.5 |
| 537 | 4MDN | -7.5 | -7.4 | -7.5 | -7.5 |
| 538 | 4Y72 | -7.4 | -7.5 | -7.5 | -7.5 |
| 539 | 1K3A | -7.5 | -7.5 | -7.6 | -7.5 |
| 540 | 5OMP | -7.5 | -7.4 | -7.5 | -7.5 |
| 541 | 5CR1 | -7.3 | -7.8 | -7.3 | -7.5 |
| 542 | 5ANU | -7.6 | -7.4 | -7.6 | -7.5 |
| 543 | 4IZY | -7.6 | -7.5 | -7.5 | -7.5 |
| 544 | 5DCP | -7.8 | -7.8 | -6.9 | -7.5 |
| 545 | 1NW9 | -7.4 | -7.5 | -7.6 | -7.5 |
| 546 | 3BQR | -7.5 | -7.5 | -7.5 | -7.5 |
| 547 | 4BF2 | -7.2 | -8   | -7.3 | -7.5 |
| 548 | 1MV9 | -7.5 | -7.5 | -7.5 | -7.5 |
| 549 | 2V0V | -7.6 | -7.5 | -7.5 | -7.5 |
| 550 | 2YJD | -7.6 | -7.3 | -7.6 | -7.5 |
| 551 | 3ERT | -7.7 | -7.1 | -7.7 | -7.5 |
| 552 | 3L3X | -6.8 | -7.9 | -7.9 | -7.5 |
| 553 | 3P0U | -7.5 | -7.5 | -7.5 | -7.5 |
| 554 | 4TUZ | -7.4 | -7.6 | -7.5 | -7.5 |
| 555 | 4ZSH | -7.5 | -7.5 | -7.5 | -7.5 |
| 556 | 5CJ6 | -7.9 | -7.3 | -7.4 | -7.5 |
| 557 | 5T8E | -7.5 | -7.5 | -7.5 | -7.5 |
| 558 | 1A4W | -7.5 | -7.5 | -7.5 | -7.5 |
| 559 | 1C1Y | -7.5 | -7.5 | -7.4 | -7.5 |
| 560 | 1NQL | -7.3 | -7.6 | -7.6 | -7.5 |
| 561 | 2ITN | -7.6 | -7.6 | -7.4 | -7.5 |
| 562 | 2ITU | -7.6 | -7.6 | -7.3 | -7.5 |
| 563 | 3A60 | -7.3 | -7.3 | -7.8 | -7.5 |
| 564 | 3LZB | -7.5 | -7.5 | -7.6 | -7.5 |
| 565 | 5VAD | -7.3 | -7.7 | -7.5 | -7.5 |
| 566 | 2P55 | -7.4 | -7.4 | -7.6 | -7.5 |
| 567 | 3MJG | -7.5 | -7.3 | -7.5 | -7.4 |
| 568 | 5FQT | -7.6 | -8.1 | -6.6 | -7.4 |

|     |      |      |      |      |      |
|-----|------|------|------|------|------|
| 569 | 5ORL | -7.4 | -7.4 | -7.4 | -7.4 |
| 570 | 1S3X | -7.3 | -7.3 | -7.7 | -7.4 |
| 571 | 1IMV | -7.9 | -7.2 | -7.2 | -7.4 |
| 572 | 1ZHM | -7.4 | -7.6 | -7.2 | -7.4 |
| 573 | 3IEO | -7.4 | -7.4 | -7.4 | -7.4 |
| 574 | 1Y57 | -7.5 | -7.2 | -7.6 | -7.4 |
| 575 | 2XK9 | -7.4 | -7.4 | -7.4 | -7.4 |
| 576 | 3ZBF | -7.4 | -7.4 | -7.4 | -7.4 |
| 577 | 4URV | -7.4 | -7.4 | -7.4 | -7.4 |
| 578 | 2HI4 | -7.4 | -7.4 | -7.4 | -7.4 |
| 579 | 1B1I | -7.4 | -7.4 | -7.4 | -7.4 |
| 580 | 2QMG | -8.2 | -6.8 | -7.1 | -7.4 |
| 581 | 2QP8 | -7.3 | -7.7 | -7.3 | -7.4 |
| 582 | 2WEZ | -7.2 | -7.8 | -7.1 | -7.4 |
| 583 | 4IP9 | -7.4 | -7.4 | -7.4 | -7.4 |
| 584 | 2JDF | -7.4 | -7.4 | -7.4 | -7.4 |
| 585 | 1F3M | -7.4 | -7.5 | -7.4 | -7.4 |
| 586 | 1WDZ | -7.4 | -7.3 | -7.4 | -7.4 |
| 587 | 1Y2O | -7.5 | -7.5 | -7.3 | -7.4 |
| 588 | 1G73 | -7.5 | -7.1 | -7.6 | -7.4 |
| 589 | 1GFW | -7.3 | -7.4 | -7.4 | -7.4 |
| 590 | 2GCP | -6.7 | -7.7 | -7.7 | -7.4 |
| 591 | 1K74 | -7.4 | -7.4 | -7.4 | -7.4 |
| 592 | 3ET3 | -7.4 | -7.4 | -7.4 | -7.4 |
| 593 | 4M8E | -7.4 | -7.4 | -7.4 | -7.4 |
| 594 | 4M8H | -7.4 | -7.4 | -7.3 | -7.4 |
| 595 | 1OL5 | -7.7 | -7.4 | -7.1 | -7.4 |
| 596 | 4RG2 | -7.4 | -7.4 | -7.4 | -7.4 |
| 597 | 4THN | -7.2 | -7.1 | -7.8 | -7.4 |
| 598 | 1YWN | -7.3 | -7.3 | -7.3 | -7.3 |
| 599 | 6BCA | -8.2 | -6.4 | -7.3 | -7.3 |
| 600 | 1C5X | -7.2 | -7.7 | -7.1 | -7.3 |
| 601 | 1PY5 | -7.2 | -7.3 | -7.4 | -7.3 |
| 602 | 2O72 | -7   | -7.8 | -7   | -7.3 |
| 603 | 3MJ1 | -7.3 | -7.3 | -7.3 | -7.3 |
| 604 | 4GQS | -7.7 | -7   | -7.2 | -7.3 |
| 605 | 5HK1 | -7.6 | -7.3 | -7.1 | -7.3 |
| 606 | 2XN7 | -7.2 | -7.6 | -7.2 | -7.3 |
| 607 | 4N1T | -7.3 | -7.3 | -7.3 | -7.3 |
| 608 | 2J8Z | -7.3 | -7.4 | -7.3 | -7.3 |
| 609 | 3FAY | -7.3 | -7.2 | -7.3 | -7.3 |

|     |          |      |      |      |      |
|-----|----------|------|------|------|------|
| 610 | 1P2S     | -7.3 | -7.3 | -7.3 | -7.3 |
| 611 | 1GS4     | -7.1 | -7.8 | -7.1 | -7.3 |
| 612 | 1.00E+99 | -7.3 | -7.3 | -7.3 | -7.3 |
| 613 | 2EB3     | -7.5 | -6.7 | -7.6 | -7.3 |
| 614 | 2ITX     | -7.2 | -7.3 | -7.3 | -7.3 |
| 615 | 5L9B     | -7.2 | -7.2 | -7.2 | -7.2 |
| 616 | 4KXQ     | -7.2 | -7.2 | -7.1 | -7.2 |
| 617 | 2X2L     | -7.2 | -7.2 | -7.2 | -7.2 |
| 618 | 4NJD     | -7   | -7.6 | -7   | -7.2 |
| 619 | 5NJX     | -7.3 | -7.3 | -7   | -7.2 |
| 620 | 1A9U     | -7.2 | -7.2 | -7.2 | -7.2 |
| 621 | 2B7A     | -7.2 | -7.6 | -6.8 | -7.2 |
| 622 | 4X30     | -7.3 | -7.1 | -7.1 | -7.2 |
| 623 | 4G5J     | -7.2 | -7.1 | -7.2 | -7.2 |
| 624 | 1MVC     | -7.2 | -7.3 | -7.2 | -7.2 |
| 625 | 5G5W     | -7.2 | -7.2 | -7.2 | -7.2 |
| 626 | 1JSV     | -7.2 | -7.2 | -7.2 | -7.2 |
| 627 | 1KAO     | -7.2 | -7.2 | -7.2 | -7.2 |
| 628 | 1KE5     | -7.2 | -7.2 | -7.2 | -7.2 |
| 629 | 1NCF     | -7.2 | -7.2 | -7.2 | -7.2 |
| 630 | 2LWI     | -7.3 | -7.2 | -7.2 | -7.2 |
| 631 | 3EQB     | -7.2 | -7.5 | -6.8 | -7.2 |
| 632 | 3ZZE     | -7.2 | -7.2 | -7.2 | -7.2 |
| 633 | 1EK3     | -7.1 | -7.1 | -7.1 | -7.1 |
| 634 | 4J1Y     | -7.1 | -7.1 | -7   | -7.1 |
| 635 | 3EW8     | -7.1 | -7.1 | -7.1 | -7.1 |
| 636 | 1A2B     | -7.1 | -7.1 | -7.1 | -7.1 |
| 637 | 3EYG     | -7.3 | -7   | -7   | -7.1 |
| 638 | 1SM2     | -7.2 | -7.2 | -7   | -7.1 |
| 639 | 3EO2     | -7.1 | -7.1 | -7.1 | -7.1 |
| 640 | 1P22     | -7.1 | -7.2 | -7.1 | -7.1 |
| 641 | 1R2D     | -7.1 | -7.1 | -7.1 | -7.1 |
| 642 | 1RE1     | -7.1 | -7.1 | -7.1 | -7.1 |
| 643 | 1MZN     | -7.1 | -7.1 | -7.1 | -7.1 |
| 644 | 3CJW     | -7.1 | -7.1 | -7.1 | -7.1 |
| 645 | 1GII     | -7.2 | -7.2 | -6.8 | -7.1 |
| 646 | 1H00     | -6.6 | -7.4 | -7.4 | -7.1 |
| 647 | 2R4B     | -7.1 | -7.1 | -7.1 | -7.1 |
| 648 | 1.00E+31 | -7   | -7   | -7   | -7   |
| 649 | 1EDM     | -7   | -7   | -7   | -7   |
| 650 | 2P55     | -6.8 | -7.4 | -6.8 | -7   |

|     |      |      |      |      |      |
|-----|------|------|------|------|------|
| 651 | 3UQP | -7.2 | -7.2 | -6.7 | -7   |
| 652 | 5H1D | -7   | -7   | -7   | -7   |
| 653 | 1TW6 | -7.2 | -6.7 | -7.2 | -7   |
| 654 | 1UPK | -7   | -7.1 | -6.9 | -7   |
| 655 | 3U6I | -6.9 | -7.1 | -7   | -7   |
| 656 | 1UOU | -6.9 | -6.9 | -6.9 | -6.9 |
| 657 | 5TQE | -6.9 | -6.9 | -6.8 | -6.9 |
| 658 | 1T69 | -7   | -6.8 | -7   | -6.9 |
| 659 | 2KAV | -6.9 | -6.9 | -6.9 | -6.9 |
| 660 | 2PIV | -6.9 | -7   | -6.9 | -6.9 |
| 661 | 2ROY | -6.6 | -7.6 | -6.6 | -6.9 |
| 662 | 3VKX | -6.7 | -7.3 | -6.7 | -6.9 |
| 663 | 3F6Q | -6.9 | -6.9 | -6.9 | -6.9 |
| 664 | 1PAU | -7   | -6.9 | -6.9 | -6.9 |
| 665 | 1SVC | -7.1 | -6.7 | -6.8 | -6.9 |
| 666 | 4KMN | -6.9 | -6.9 | -6.9 | -6.9 |
| 667 | 2JJC | -7.2 | -6.8 | -6.3 | -6.8 |
| 668 | 2QLD | -6.8 | -6.7 | -6.8 | -6.8 |
| 669 | 2UWD | -6.7 | -6.7 | -6.9 | -6.8 |
| 670 | 1T67 | -6.8 | -6.7 | -6.8 | -6.8 |
| 671 | 1AIE | -6.8 | -6.8 | -6.8 | -6.8 |
| 672 | 2QU5 | -7.1 | -6.4 | -6.9 | -6.8 |
| 673 | 3AYU | -6.8 | -6.8 | -6.8 | -6.8 |
| 674 | 1NME | -6.9 | -6.8 | -6.8 | -6.8 |
| 675 | 1ZUQ | -6.8 | -6.8 | -6.9 | -6.8 |
| 676 | 2EVW | -6.8 | -6.8 | -6.9 | -6.8 |
| 677 | 3MK8 | -6.8 | -6.8 | -6.8 | -6.8 |
| 678 | 5C3H | -6.8 | -6.8 | -6.8 | -6.8 |
| 679 | 1UOM | -6.7 | -6.6 | -7.2 | -6.8 |
| 680 | 2YJA | -6.8 | -6.8 | -6.8 | -6.8 |
| 681 | 5NZP | -6.8 | -6.8 | -6.8 | -6.8 |
| 682 | 1JDH | -6.7 | -6.7 | -6.7 | -6.7 |
| 683 | 1CJY | -6.2 | -7.2 | -6.6 | -6.7 |
| 684 | 4KGH | -6.6 | -6.5 | -6.9 | -6.7 |
| 685 | 3UEE | -6.7 | -6.7 | -6.8 | -6.7 |
| 686 | 5FC4 | -6.7 | -6.7 | -6.7 | -6.7 |
| 687 | 3K6P | -6.7 | -6.7 | -6.7 | -6.7 |
| 688 | 2CCS | -6.6 | -6.6 | -6.6 | -6.6 |
| 689 | 2CCT | -6.5 | -6.8 | -6.5 | -6.6 |
| 690 | 3BM9 | -6.6 | -6.5 | -6.6 | -6.6 |
| 691 | 5J2X | -6.7 | -6.5 | -6.5 | -6.6 |

|     |      |      |      |      |      |
|-----|------|------|------|------|------|
| 692 | 4LGE | -6.6 | -6.6 | -6.6 | -6.6 |
| 693 | 1UNL | -6.6 | -6.7 | -6.6 | -6.6 |
| 694 | 4AL0 | -6.6 | -6.6 | -6.6 | -6.6 |
| 695 | 5EXO | -6.6 | -6.6 | -6.6 | -6.6 |
| 696 | 3UIH | -6.8 | -6.4 | -6.7 | -6.6 |
| 697 | 5NZO | -6.6 | -6.6 | -6.7 | -6.6 |
| 698 | 2CCU | -6.5 | -6.5 | -6.5 | -6.5 |
| 699 | 3BWM | -6.5 | -6.5 | -6.6 | -6.5 |
| 700 | 3OZK | -6.5 | -6.4 | -6.5 | -6.5 |
| 701 | 2BIT | -6.4 | -6.5 | -6.5 | -6.5 |
| 702 | 1GH7 | -6.1 | -6.9 | -6.6 | -6.5 |
| 703 | 2BSM | -6.4 | -6.4 | -6.4 | -6.4 |
| 704 | 2VCJ | -6.5 | -6.4 | -6.4 | -6.4 |
| 705 | 4WVS | -6.4 | -6.4 | -6.5 | -6.4 |
| 706 | 1THA | -6.3 | -6.3 | -6.3 | -6.3 |
| 707 | 1DEB | -6.2 | -6.2 | -6.2 | -6.2 |
| 708 | 2FJ5 | -5.8 | -5.8 | -5.8 | -5.8 |

**Table S3.** RMSD and Superposition between the crystallographic structures of 13 the complexes and the resultant docking pose (Poses obtained is represented in green).

| PDB code | Ligand | Reference | Binding Affinity | RMSD (Å) | Overlapping ligand                                                                    |
|----------|--------|-----------|------------------|----------|---------------------------------------------------------------------------------------|
| 3O0I     | P54    | [5]       | -9.3             | 0.984    | 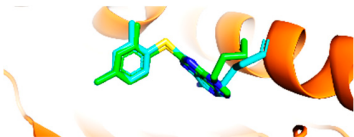   |
| 4DRJ     | RAP    | [6]       | -8.1             | 0.322    |    |
| 3NMQ     | 7PP    | [7]       | -10.1            | 1.579    |   |
| 1HFQ     | MOT    | [8]       | -9.4             | 1.159    |  |
| 1N83     | CLR    | [9]       | -10.9            | 1.693    |  |
| 1P8D     | CO1    | [10]      | -8.9             | 2.578    |  |
| 4XII     | 40V    | [11]      | -10.8            | 0.765    |  |

|      |     |      |       |          |                                                                                       |
|------|-----|------|-------|----------|---------------------------------------------------------------------------------------|
| 1Z57 | DBQ | [12] | -9.6  | 0.000441 | 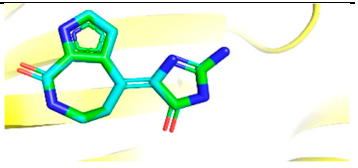   |
| 2WKM | SO4 | [13] | -11.4 | 1.619    |    |
| 3H1V | TK1 | [14] | -12.1 | 0.495    |    |
| 4AOJ | V4Z | [15] | -8.9  | 1.421    |   |
| 4NOS | H2B | [16] | -7.2  | 0.464    |  |
| 5GPG | RAP | [17] | -9.5  | 0.516    |  |

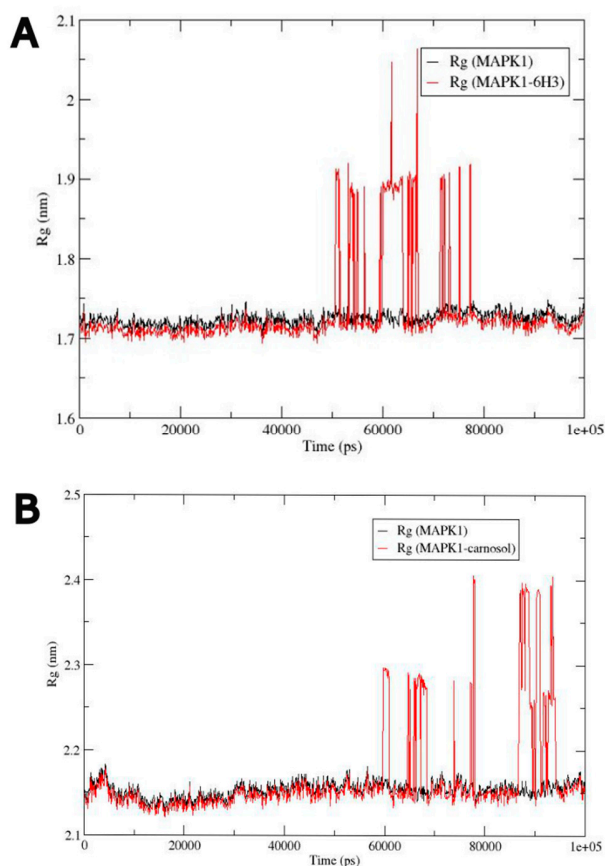

**Fig. S2.** Radius of gyration for MAPK1 complexes. Radius of gyration for MAPK1-6H3 complex (A) and radius of gyration for MAPK1-carnosol complex (B).

## References

1. Mena P, Cirlini M, Tassotti M, Herrlinger KA, Dall'Asta C, Del Rio D. Phytochemical profiling of flavonoids, phenolic acids, terpenoids, and volatile fraction of a rosemary (*Rosmarinus officinalis* L.) extract. *Molecules*. 2015; 21(11): 1576.
2. Zou D, Wang J, Zhang B, Xie S, Wang Q, Xu K, Lin R. Analysis of chemical constituents in Wuzi-Yanzong-Wan by UPLC-ESI-LTQ-orbitrap-MS. *Molecules*. 2015; 20(12): 21373-21404.
3. Wang L, Gan C, Wang Z, Liu L, Gao M, Li Q, Yang C. Determination and pharmacokinetic study of three diterpenes in rat plasma by UHPLC-ESI-MS/MS after oral administration of *Rosmarinus officinalis* L. extract. *Molecules*. 2017; 22(6): 934.

4. Zhang Y, Smuts JP, Doddiba E, Rangarajan R, Lang JC, Armstrong DW. Degradation study of carnosic acid, carnosol, rosmarinic acid, and rosemary extract (*Rosmarinus officinalis* L.) assessed using HPLC. *J. Agric. Food Chem.* 2012; 60(36): 9305-9314.
5. Patel, P.D.; Yan, P.; Seidler, P.M.; Patel, H.J.; Sun, W.; Yang, C.; Que, N.S.; Taldone, T.; Finotti, P.; Stephani, R.A.; Gewirth, D.T.; Chiosis, G. Paralog-selective Hsp90 inhibitors define tumor-specific regulation of HER2. *Nat. Chem. Biol.* 2013, 9, 677–684.
6. März, A. M.; Fabian, A. K.; Kozany, C.; Bracher, A.; Hausch, F. Large FK506-binding proteins shape the pharmacology of rapamycin. *Mol. Cell. Biol.* 2013, 33(7), 1357-1367.
7. Yun, T. J.; Harning, E. K.; Giza, K.; Rabah, D.; Li, P.; Arndt, J. W.; Luchetti, D.; Biamonte, M. A.; Shi, J.; Lundgren, K.; Manning, A.; Kehry, M. R. EC144, a Synthetic Inhibitor of Heat Shock Protein 90, Blocks Innate and Adaptive Immune Responses in Models of Inflammation and Autoimmunity. *J Immunol.* 2011, 186 (1): 563–575.
